# Supplementary material for: Preparation of TiO2/Carbon Nanotubes/Reduced Graphene Oxide Composites with Enhanced Photocatalytic Activity for the Degradation of Rhodamine B
Source: MDPI journal article supplement (doi:10.3390/nano8060431), 2018-06-13
Supplement: s1 [file s1]

# Supplementary Materials: Preparation of TiO<sub>2</sub>/Carbon Nanotubes/Reduced Graphene Oxide Composites with Enhanced Photocatalytic Activity for the Removal of Rhodamine B

Yanzhen Huang, Dongping Chen, Xinling Hu, Yingjiang Qian and Dongxu Li

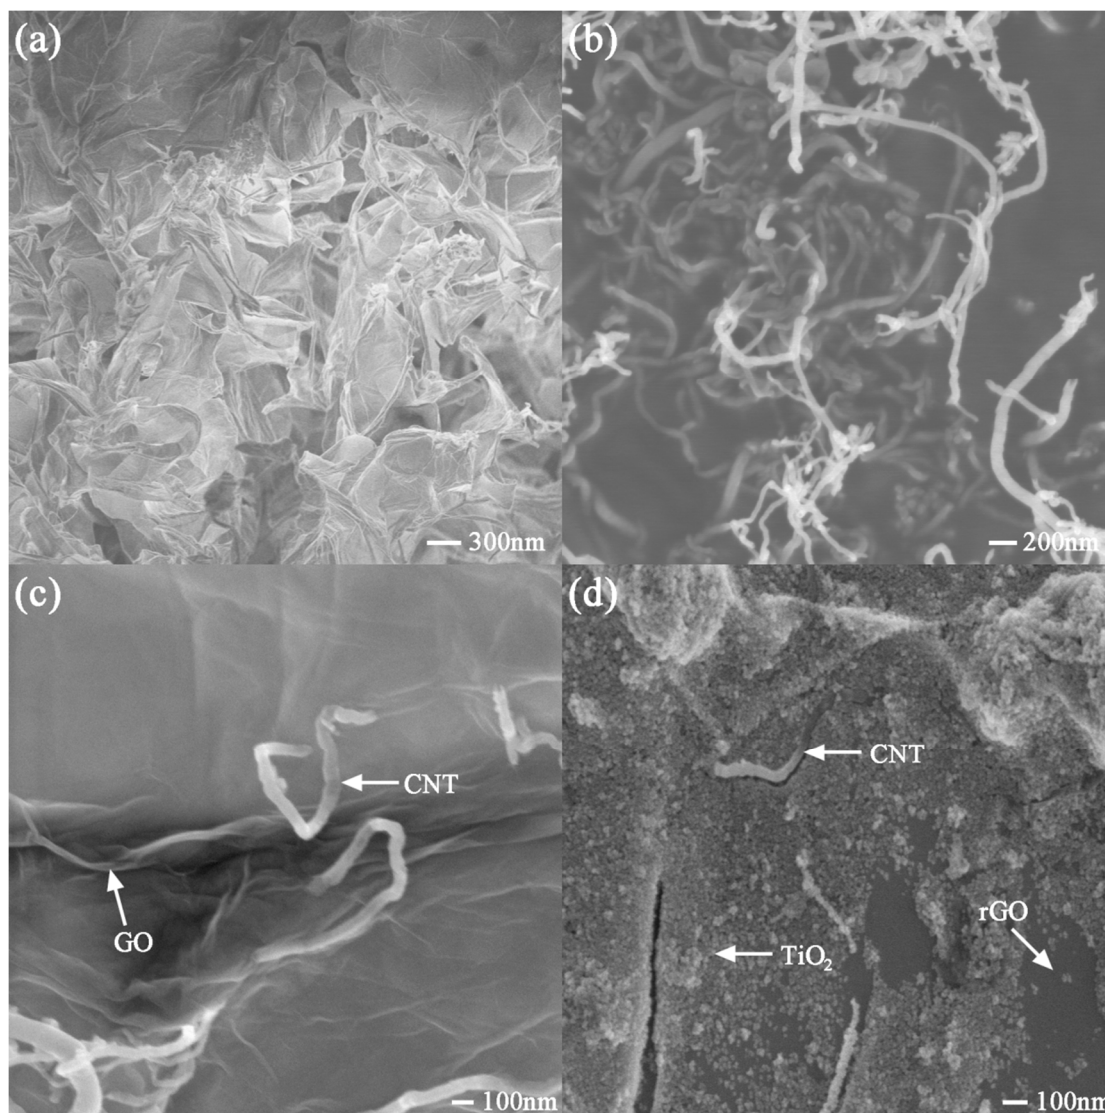

**Figure S1.** The SEM images of GO, oxide-treated CNTs, CNTs/GO, TiO<sub>2</sub>/CNTs/rGO-3%.

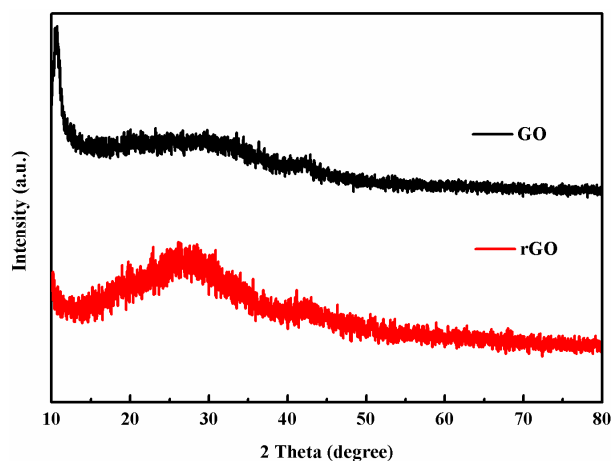

Figure S2. The XRD patterns of rGO and GO.

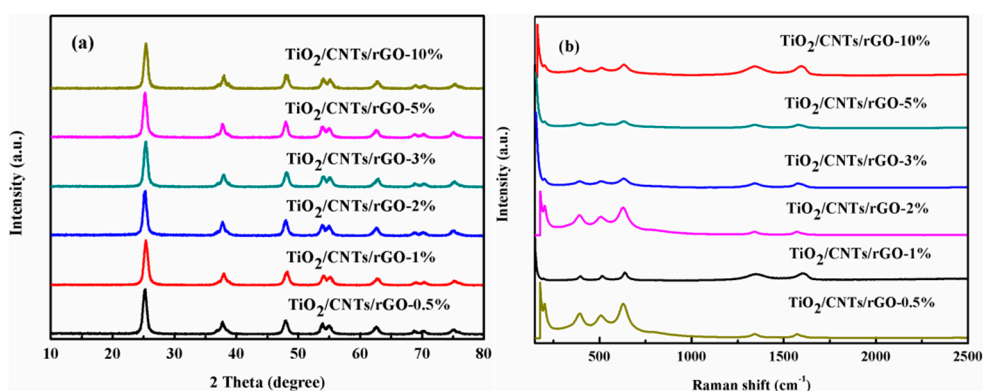

Figure S3. (a) The XRD patterns of  $\text{TiO}_2/\text{CNTs}/\text{rGO}-x\%$  ( $x = 0.5, 1, 2, 3, 5, 10$ ); (b) The Raman spectra of  $\text{TiO}_2/\text{CNTs}/\text{rGO}-x\%$  ( $x = 0.5, 1, 2, 3, 5, 10$ ).

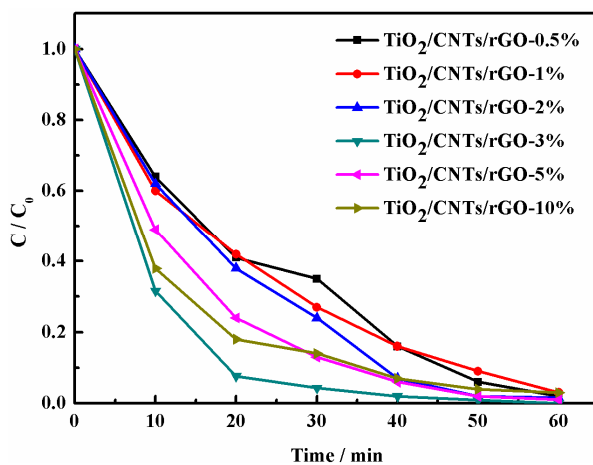

Figure S4. Plot of  $C/C_0$  vs irradiation time of RhB degradation for  $\text{TiO}_2/\text{CNTs}/\text{rGO}-x\%$  ( $x = 0.5, 1, 2, 3, 5, 10$ ).

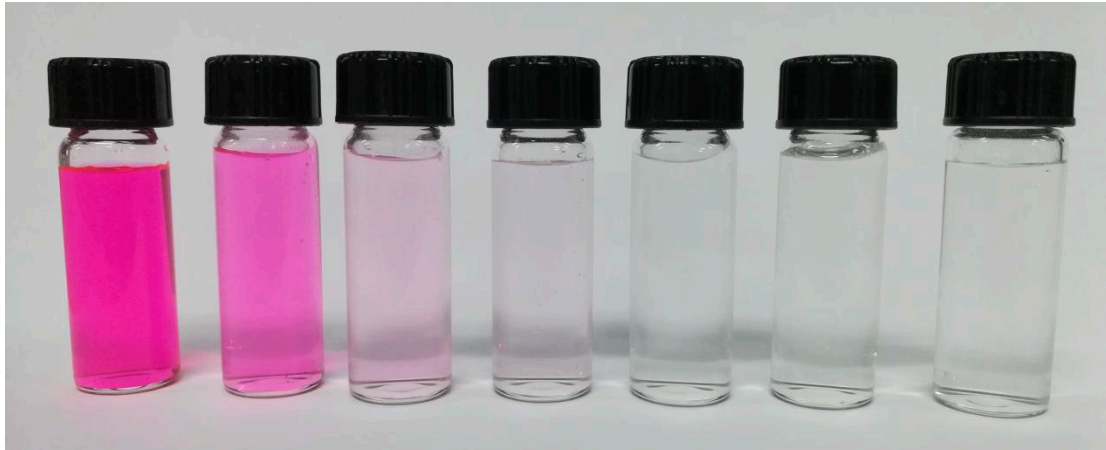

**Figure S5.** The color change of RhB solution from 0, 10, 20, 30, 40, 50, 60 min under UV-vis light (from left to right) .
